# Supplementary material
Source: PubMed Central journal article supplement (PMC4717486)
Supplement: NIHMS730535-supplement-SUPPLEMENTAL_MATERIAL.pdf [file NIHMS730535-supplement-SUPPLEMENTAL_MATERIAL.pdf]

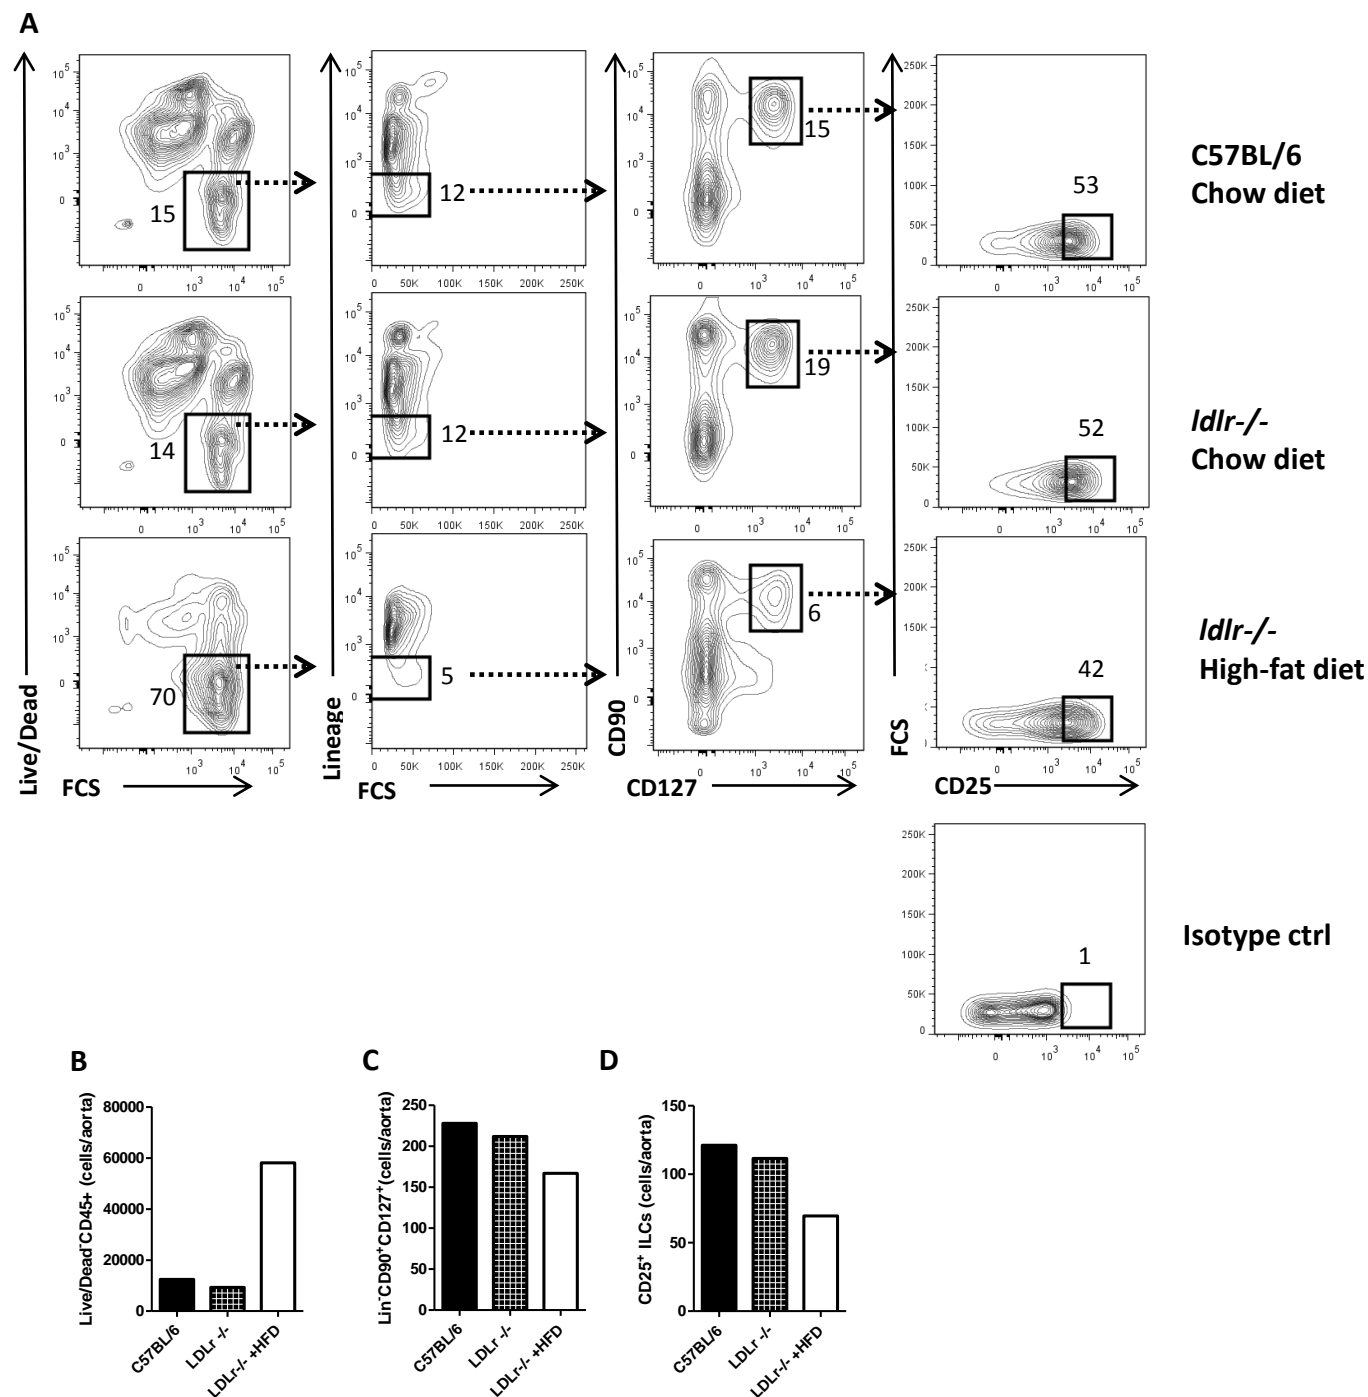

**Supplemental Figure I. High-fat diet feeding does not influence levels of ILCs in the aorta**

(A) Gating strategy of CD45<sup>+</sup> lineage (lin)<sup>-</sup>CD90<sup>+</sup>CD127<sup>+</sup>CD25<sup>+</sup> ILCs in digested aorta. Isotype control anti-CD25.

(B) Number of CD45<sup>+</sup> leukocytes, (C) lin<sup>-</sup>CD90<sup>+</sup>CD127<sup>+</sup> ILCs or (D) lin<sup>-</sup>CD90<sup>+</sup>CD127<sup>+</sup>CD25<sup>+</sup> ILCs per aorta. n=5 mice/pool.

**A**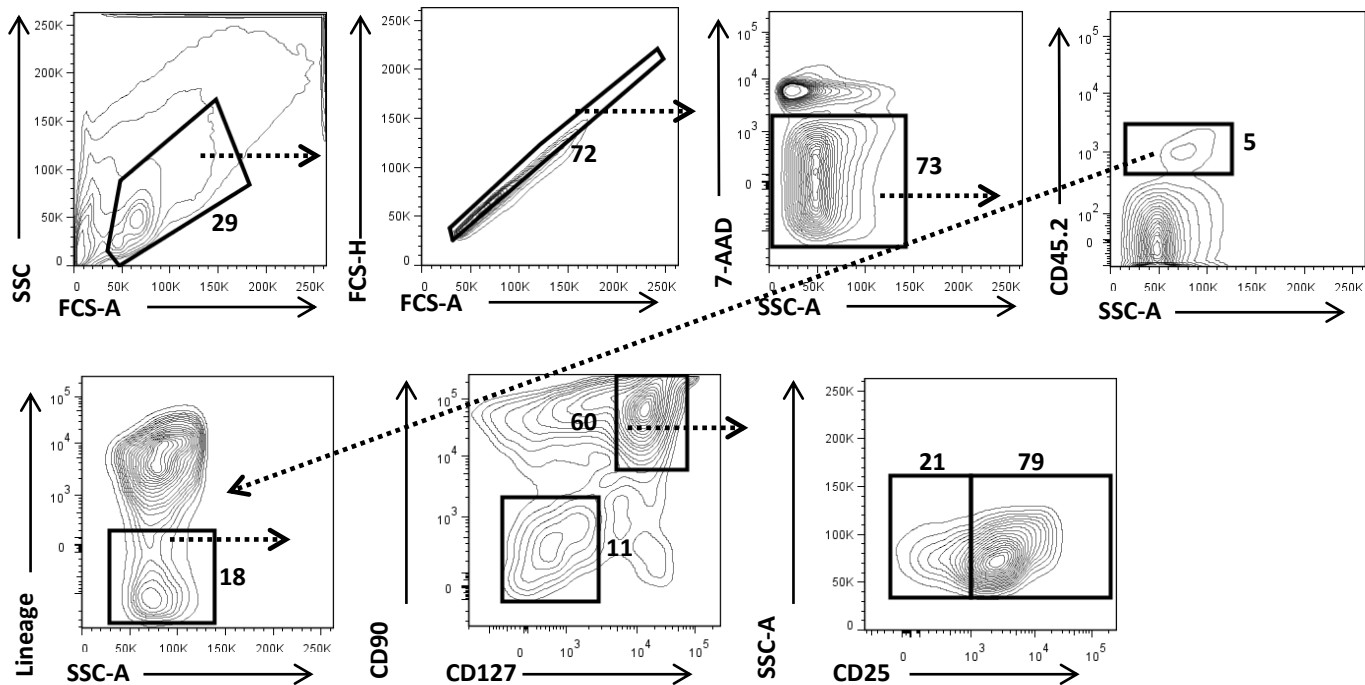**B**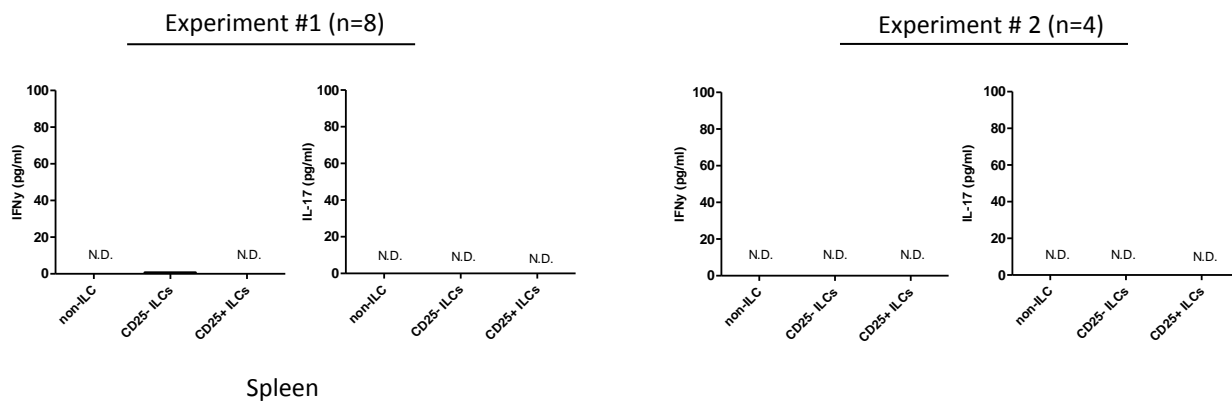**C**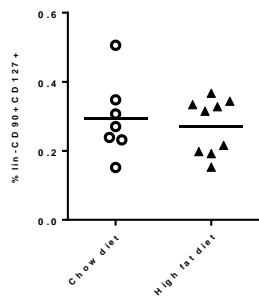**D**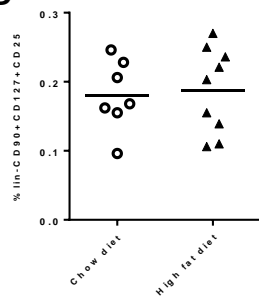

**Supplemental Figure II. Gating strategy for aortic CD90<sup>+</sup>CD127<sup>+</sup>CD25<sup>+</sup> ILCs from *rag1*<sup>-/-</sup>*Idlr*<sup>-/-</sup> mice.**

(A) Gating strategy for identification of aortic ILCs.

(B) Aortic  $\text{lin}^-\text{CD90}^-\text{CD127}^-$  (non-ILCs), CD25<sup>-</sup> ILCs and CD25<sup>+</sup> ILCs sorted by FACS and stimulated with PMA/ionomycin. Levels of IFN $\gamma$  and IL-17 in supernatants from stimulated cells was

measured in two separate experiments. (C) Quantification of splenic ILCs in *rag1*<sup>-/-</sup>*Idlr*<sup>-/-</sup> mice fed chow or high-fat diet (n=7-9).

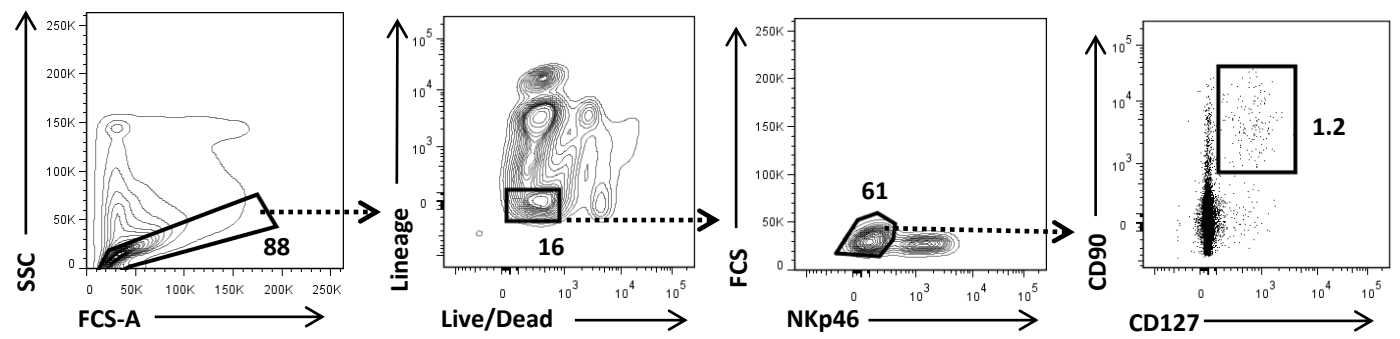

**Supplemental Figure III. Gating strategy for identification of splenic lineage- CD90<sup>+</sup>CD127<sup>+</sup> ILCs.**  
 Representative gating of splenic lin<sup>-</sup>CD90<sup>+</sup>CD127<sup>+</sup> ILCs from a *rag1*<sup>-/-</sup>*Id1r*<sup>-/-</sup> mouse fed high-fat diet and treated with control IgG..

**A** Lin<sup>-</sup>CD127<sup>+</sup>CD25<sup>+</sup>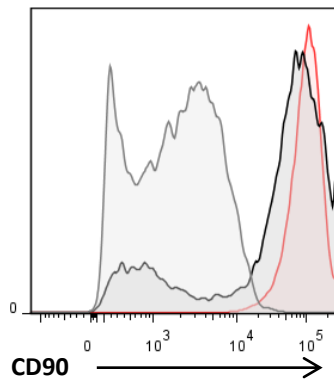**B**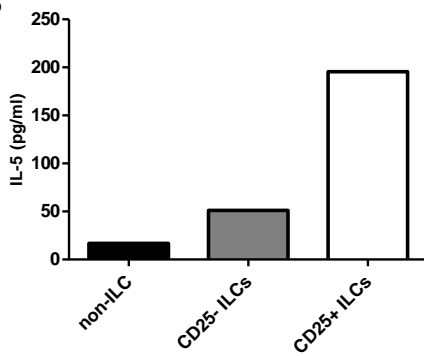**C**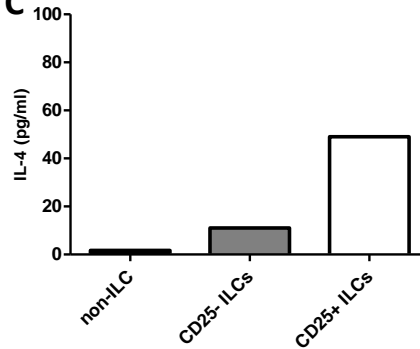**D**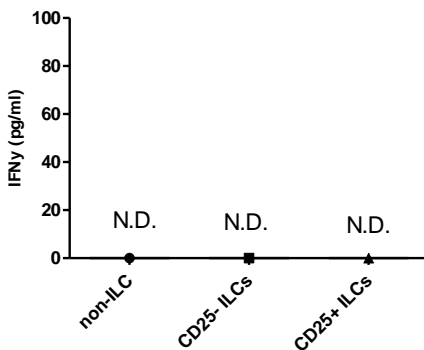**E**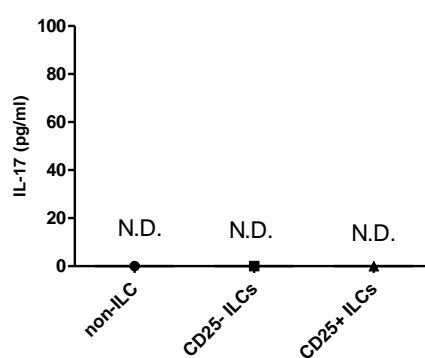**Supplemental Figure IV. Aortic ILCs from anti-CD90.2 injected mice produce type 2 cytokines.**

(A) Expression of CD90 on aortic lin<sup>-</sup>CD127<sup>+</sup>CD25<sup>+</sup> cells from anti-CD90.2 injected *rag1*<sup>-/-</sup>*Idlr*<sup>-/-</sup> mice. ILCs (CD25<sup>+</sup> or CD25<sup>-</sup>) or non-ILCs were sorted from anti-CD90.2 treated mice and stimulated with PMA/ionomycin for 24h. (B)IL-5, (C) IL-4, (D) IFN $\gamma$  and (E) IL-17 was measured in the supernatant.

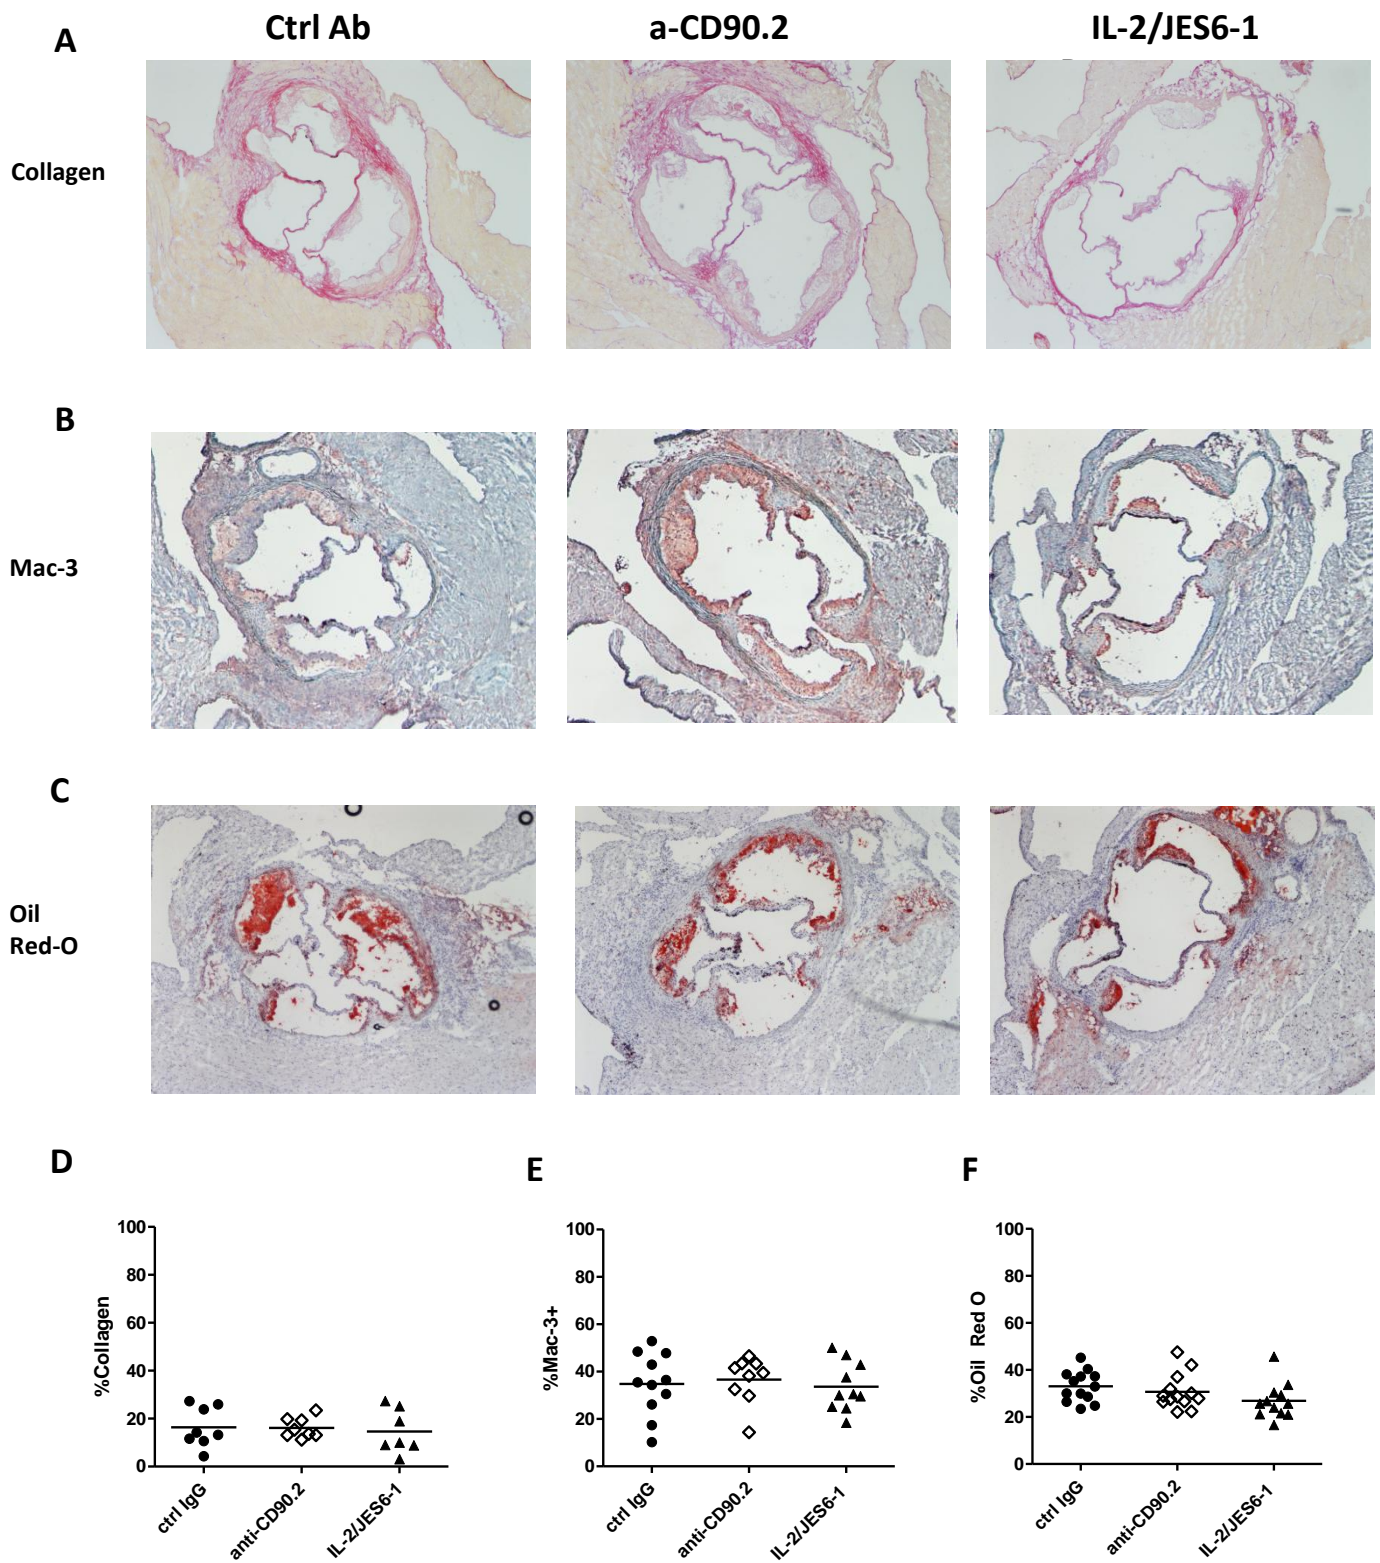

**Supplemental Figure V. No effect of ILC depletion or expansion on lesion composition**

(A) Collagen (Van Gieson), (B) macrophage (Mac-3) and (C) Oil Red-O staining of aortic sinus. Quantification of (D) Collagen, (E) macrophages and (F) Oil Red O comparing treatment groups (n=8-10).

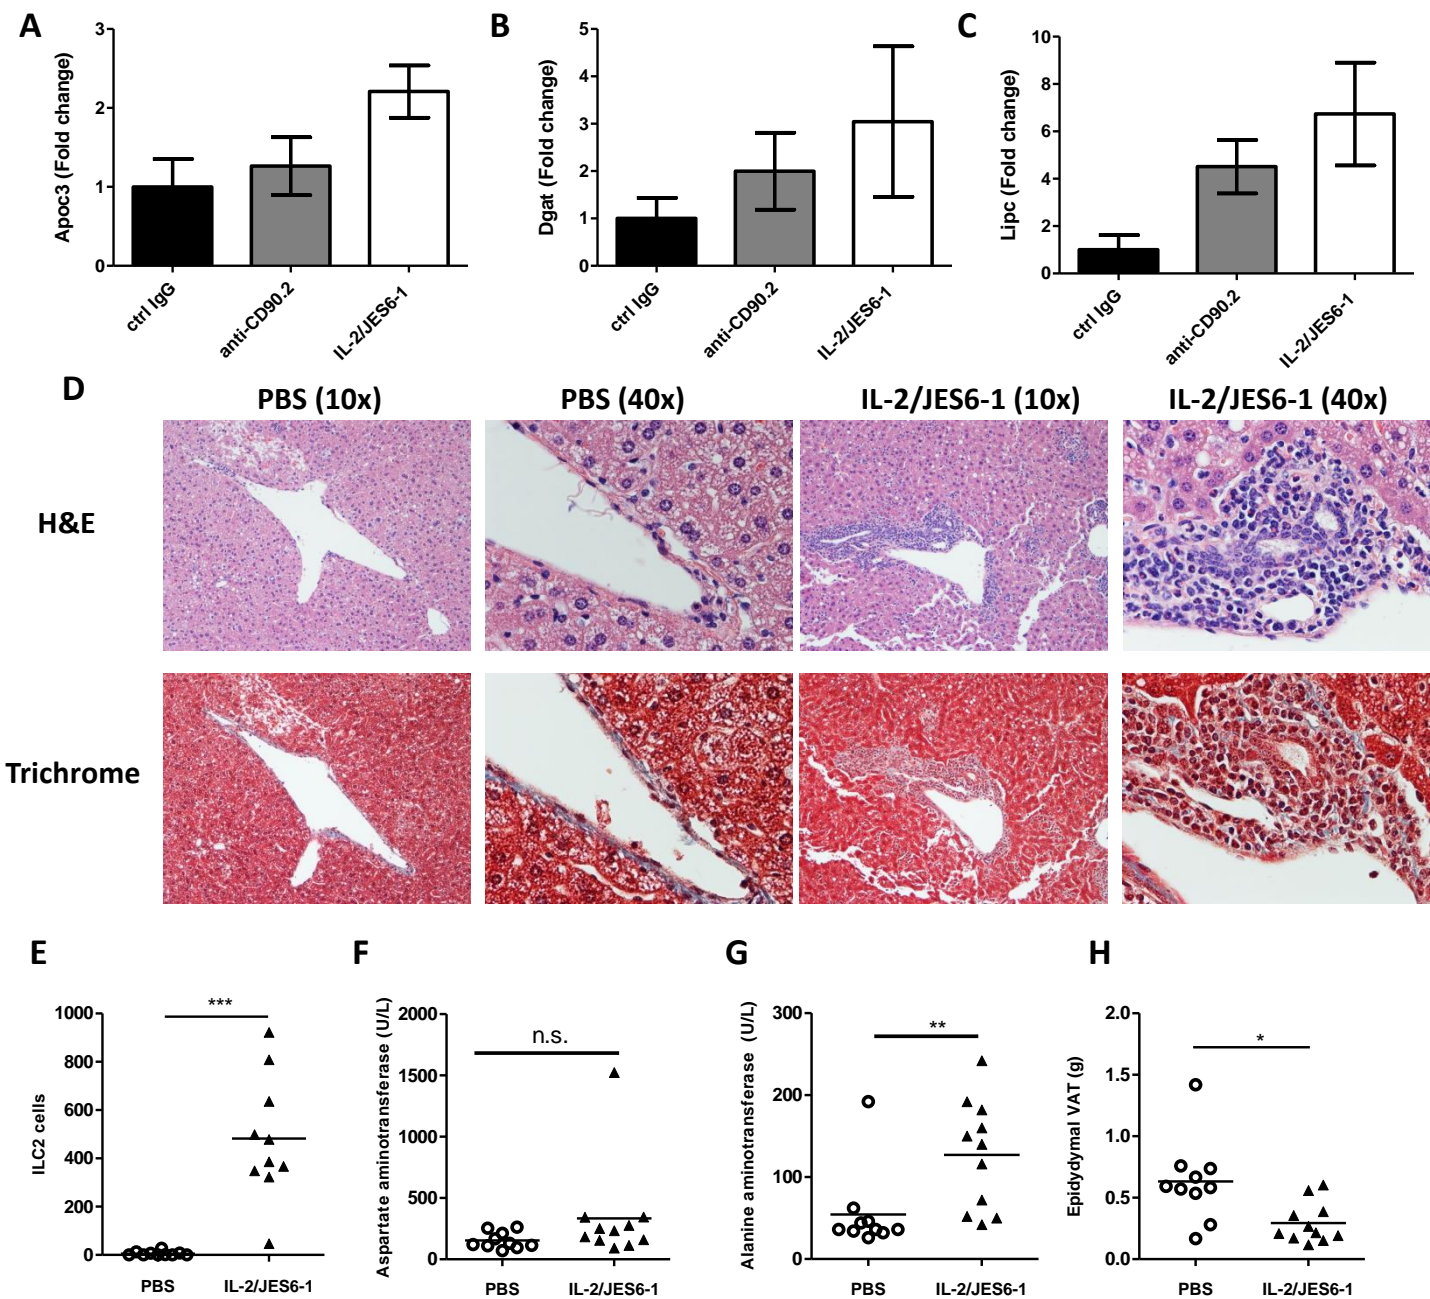

### Supplemental Figure VI. Effects of CD25<sup>+</sup> ILC expansion on liver and adipose tissue.

Hepatic RNA was isolated from mice treated with control IgG, anti-CD90.2 or IL-2/JES6-1.

(A) mRNA expression of apolipoprotein C-III (Apoc3), (B) diglyceride acetyltransferase (Dgat), and (C) hepatic lipase (Lipc) was measured by qRT-PCR (n=7-11. Mean±SEM).

In a follow-up experiment, mice were fed HFD for seven weeks and treated with PBS or IL-2/JES6-1 for the last four weeks. (D) Representative liver sections from *rag1<sup>-/-</sup>ldlr<sup>-/-</sup>* mice stained with H&E or Masson's Trichrome stain (magnification 10x and 40x).

(E) Levels of aspartate aminotransferase and (F) alanine aminotransferase

were measured in serum. (G) Epididymal visceral adipose tissue and (H) liver resident ILC2s (lin<sup>-</sup>CD90<sup>+</sup>CD25<sup>+</sup>ST2<sup>+</sup>) after seven weeks of high-fat diet and IL-2/JES6-1 treatment. (n=10-11)



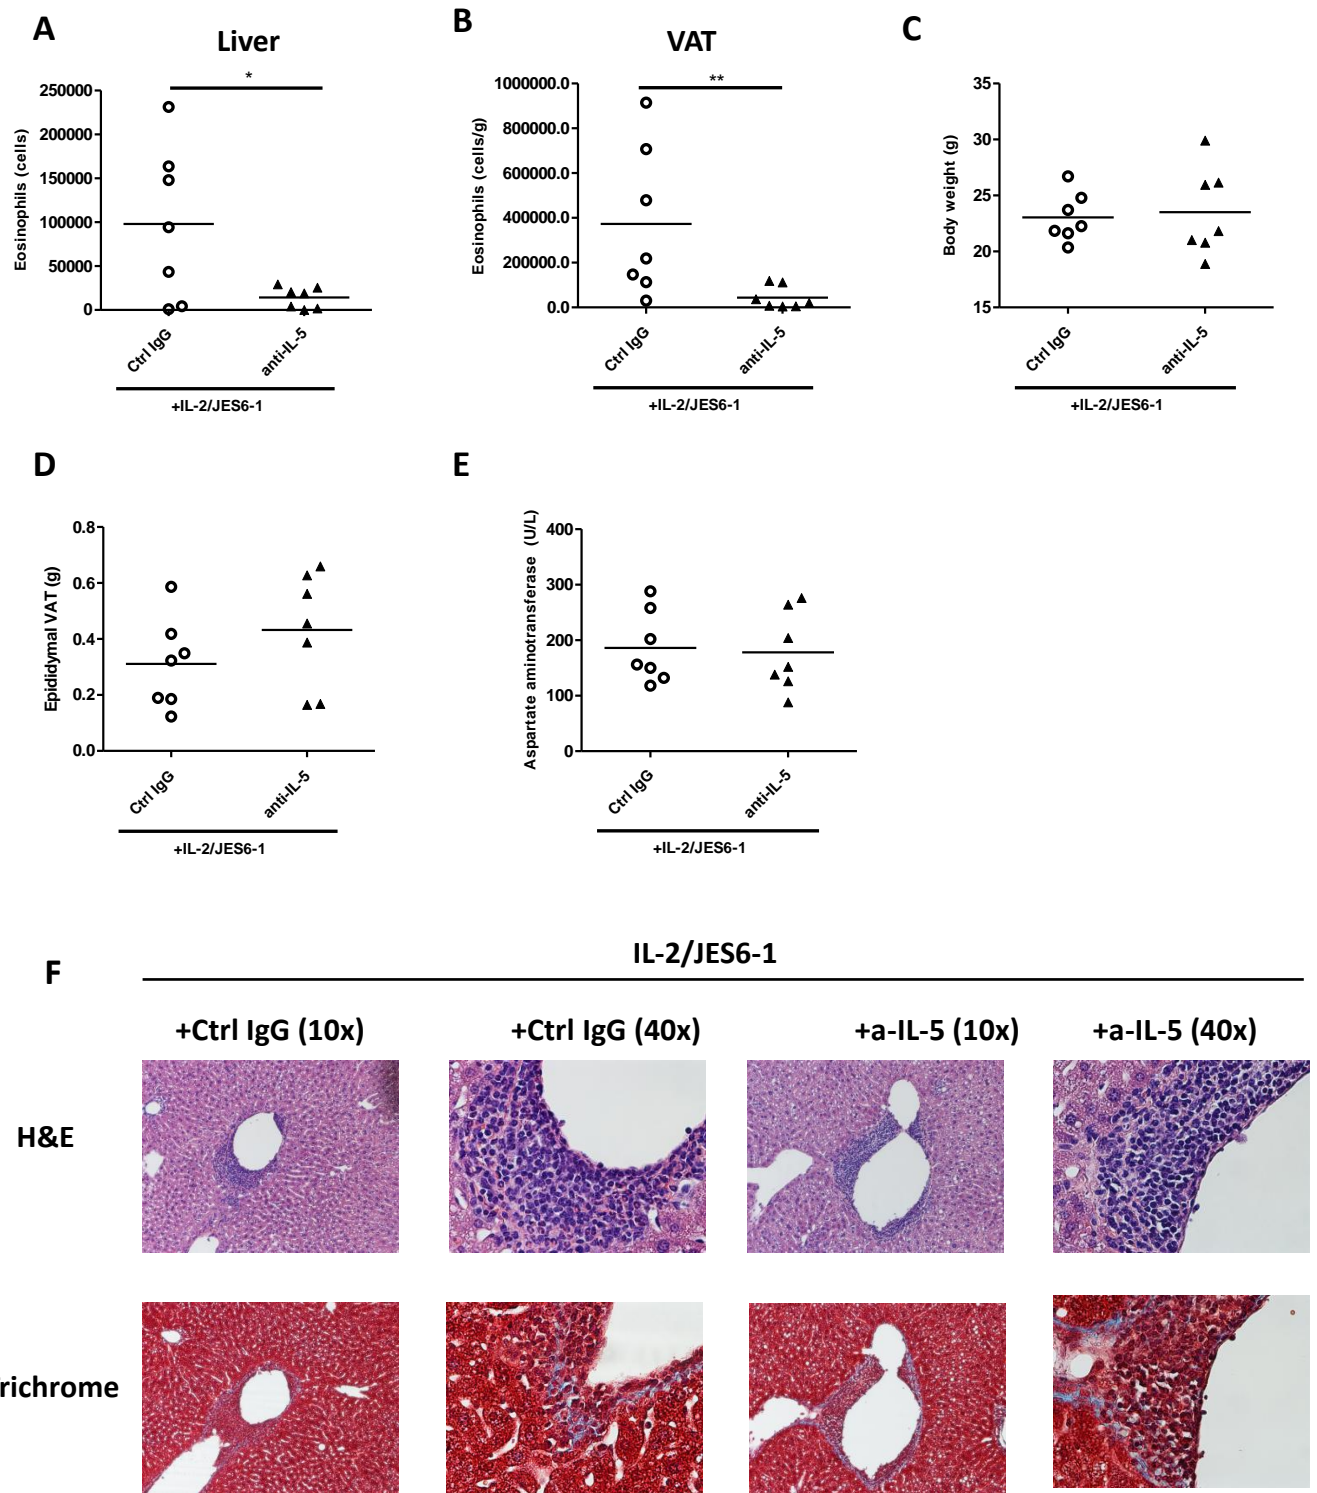

**Supplemental Figure VIII. Liver inflammation and fibrosis by IL-2 complex treatment is independent of IL-5**  
 (A) Quantification of eosinophil accumulation to (A) liver and (B) epididymal VAT of mice treated with IL-2 complex combined with either anti-IL-5 or control IgG (ctrl IgG). (C) Body weight, (D) epididymal VAT and serum levels of (E) aspartate aminotransferase. (F) Liver sections stained with H&E or Masson's trichrome (10x and 40x magnification). n=7/group.
